# Supplementary material
Source: PubMed Central journal article supplement (PMC1564296)

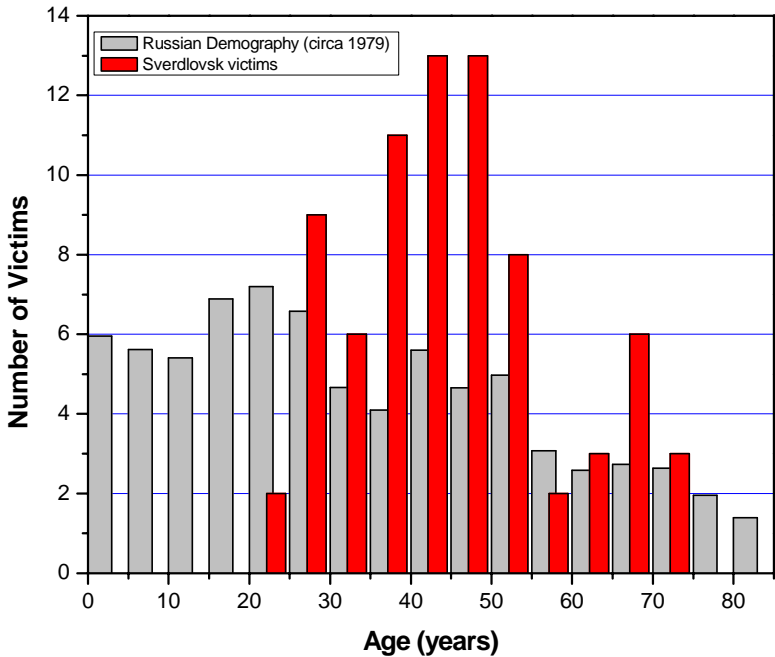

Supplement: pnas_0509551103_1.pdf [file pnas_0509551103_1.pdf]

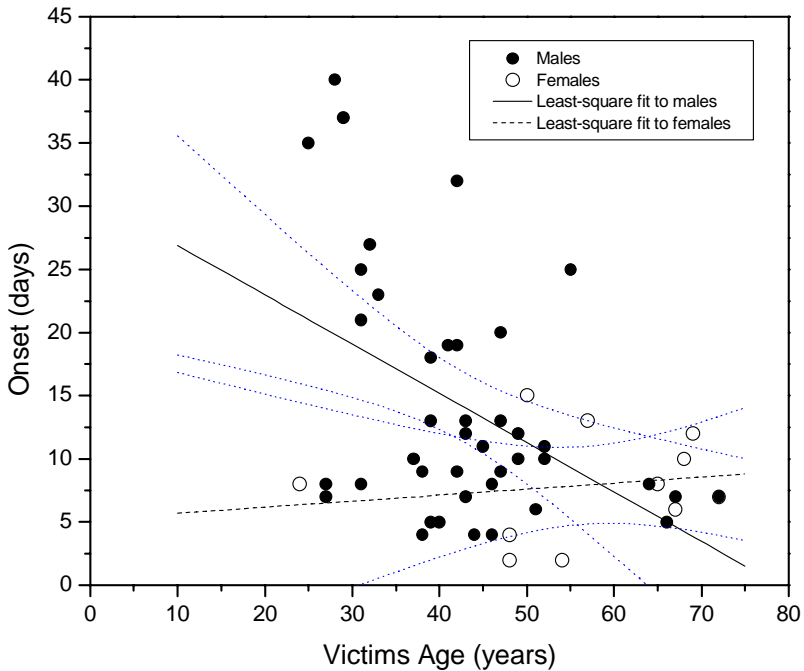

Supplement: pnas_0509551103_2.pdf [file pnas_0509551103_2.pdf]

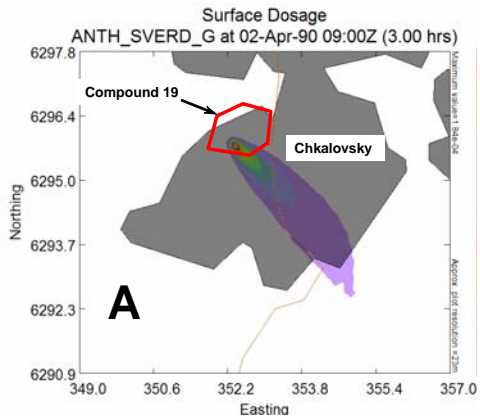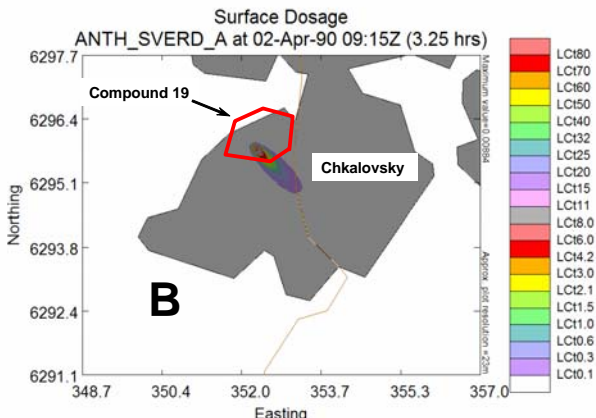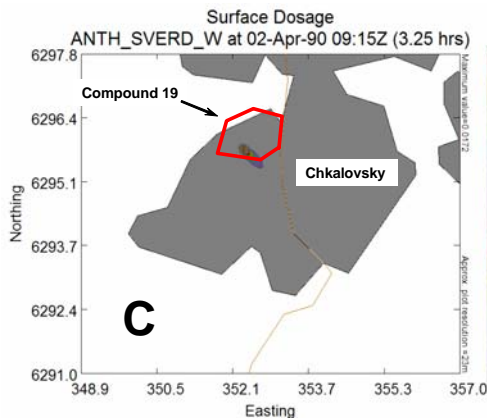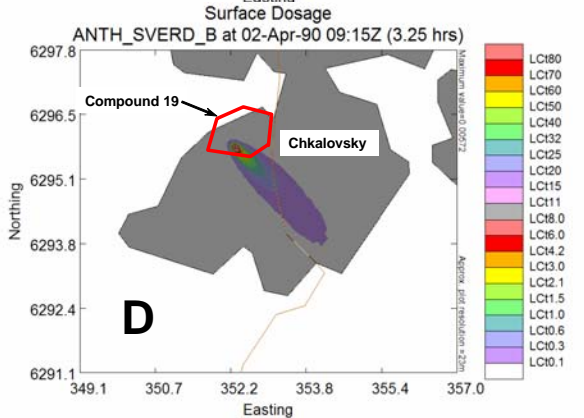

Supplement: pnas_0509551103_3.pdf [file pnas_0509551103_3.pdf]

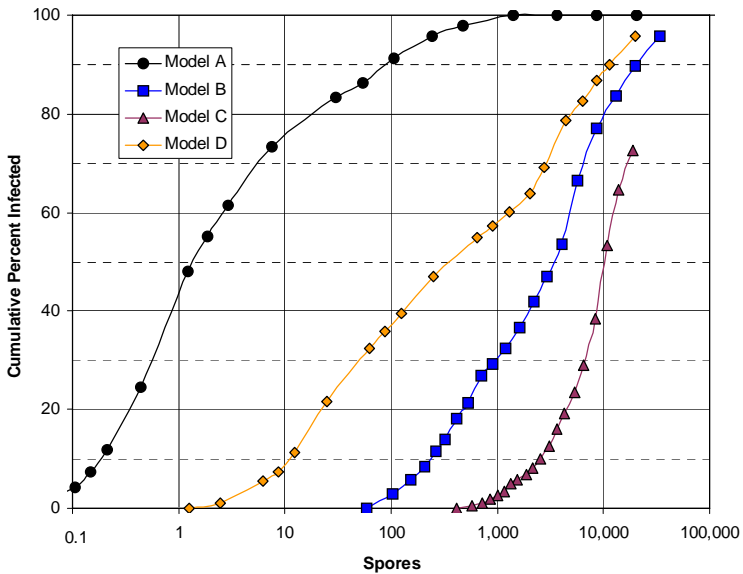

Supplement: pnas_0509551103_4.pdf [file pnas_0509551103_4.pdf]

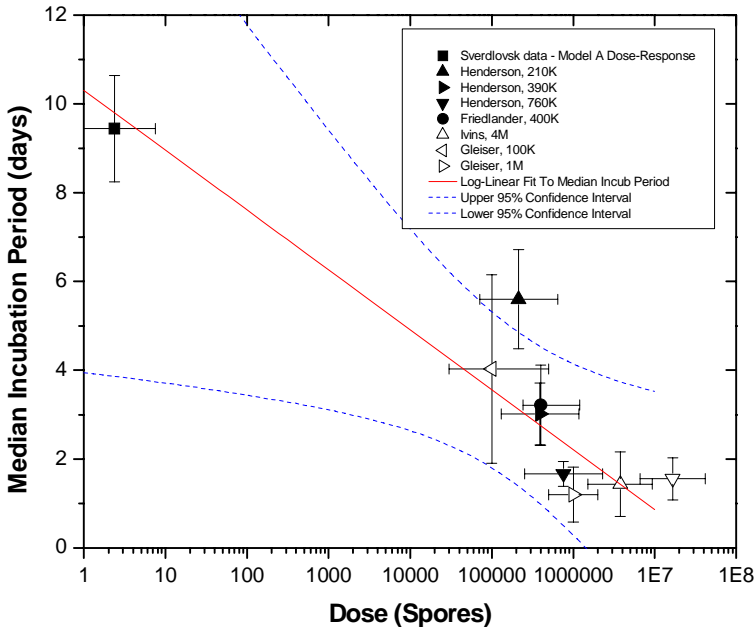

Supplement: pnas_0509551103_5.pdf [file pnas_0509551103_5.pdf]

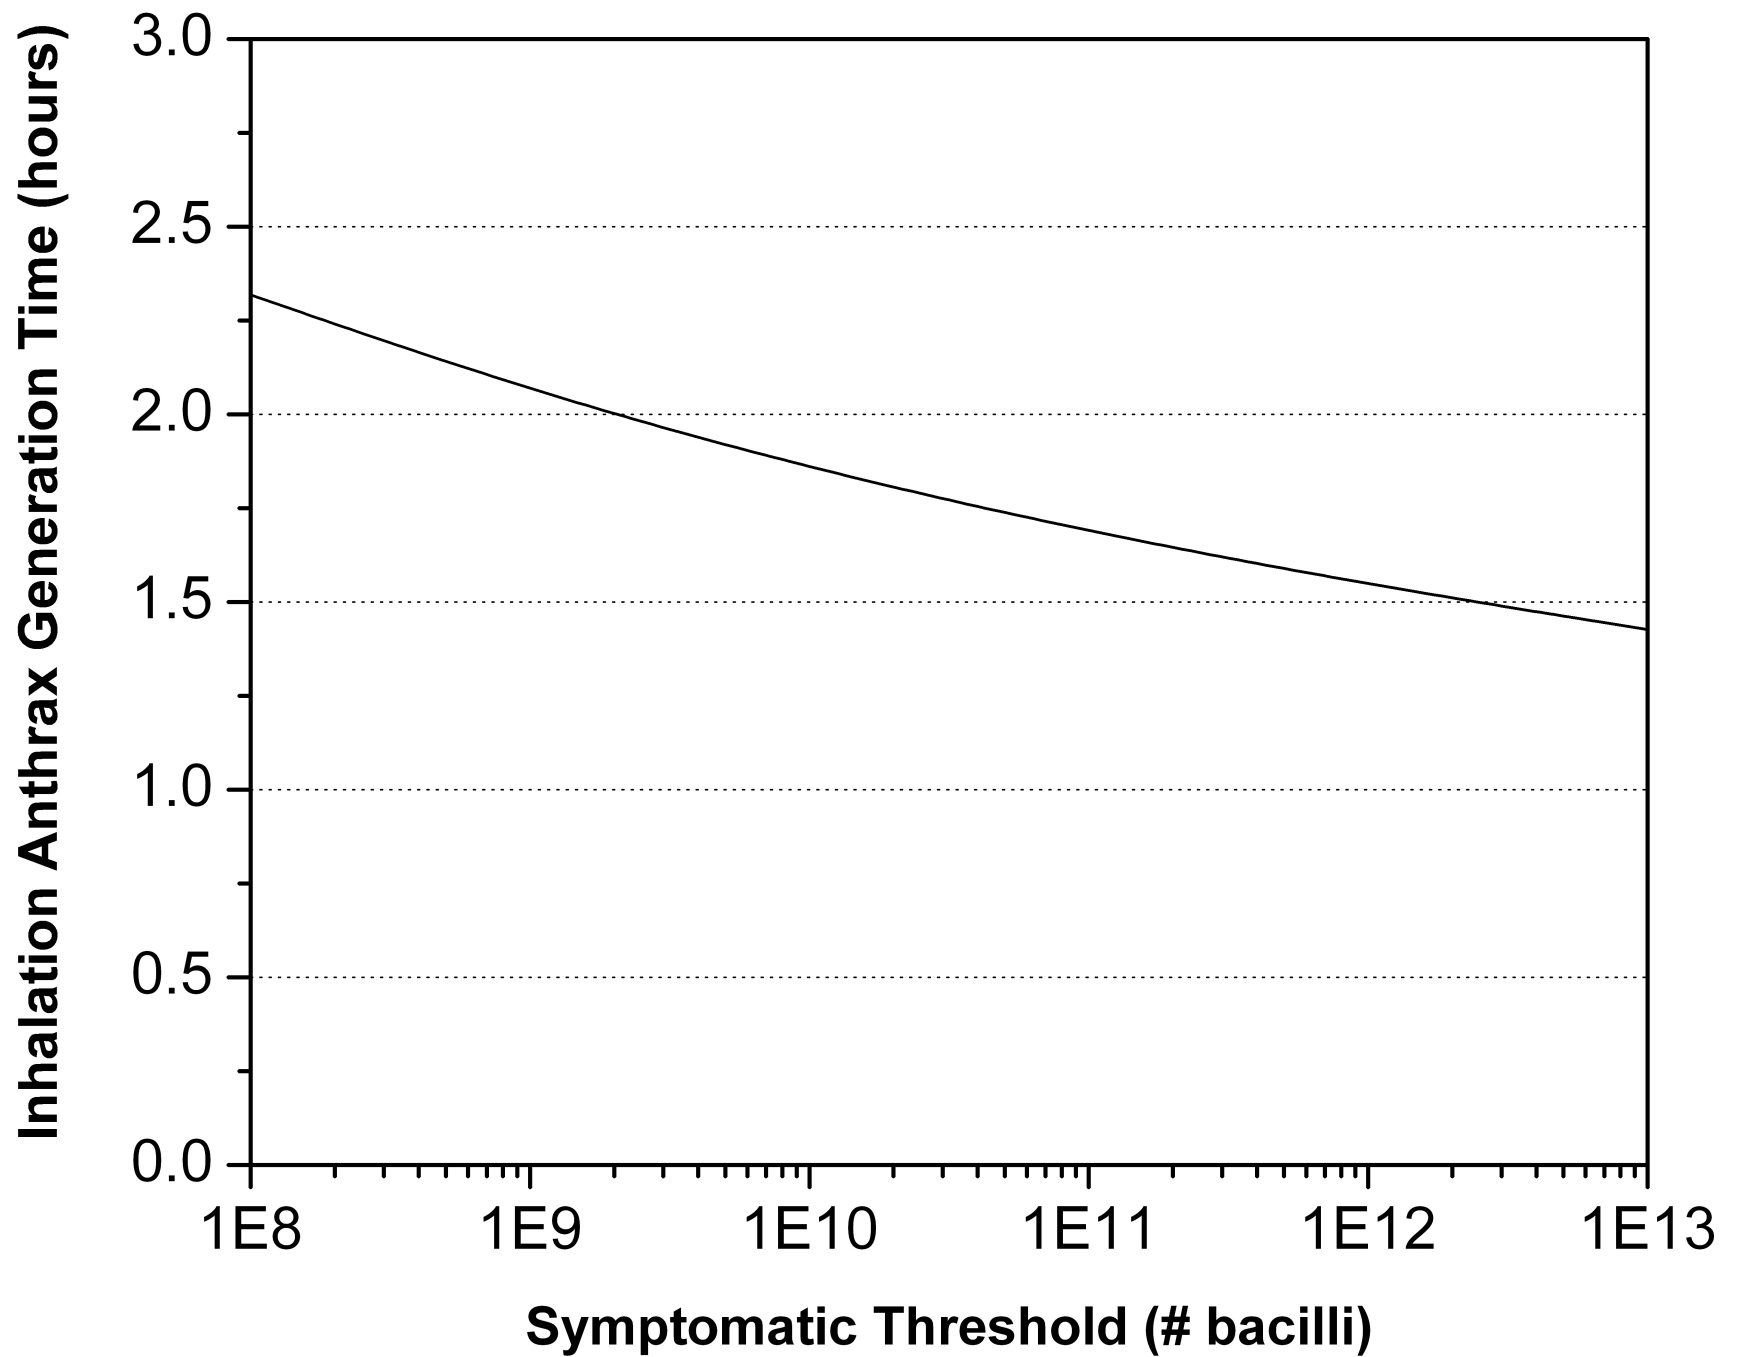

Supplement: pnas_0509551103_7.pdf [file pnas_0509551103_7.pdf]
